# Supplementary material for: Correlates of changes in walking during the retirement transition: The Multi-Ethnic Study of Atherosclerosis
Source: PubMed Central journal article supplement — Prev Med Rep. 2018 Jul 4;11:221–30. doi: 10.1016/j.pmedr.2018.07.002 (PMC6129965; doi:10.1016/j.pmedr.2018.07.002), 2018-07-04
Supplement: mmc1.pdf [file mmc1.pdf]

## Supplemental Tables

Supplemental Table 1. Distribution of potential correlates of changes in recreational walking after retirement

| Correlate                                           | Decrease<br>≤ -60 min/week | Maintain           | Increase<br>≥ 60 min/week |
|-----------------------------------------------------|----------------------------|--------------------|---------------------------|
| <b>Total</b>                                        | 247 (31%)                  | 151 (19%)          | 394 (50%)                 |
| <b>Individual correlates</b>                        |                            |                    |                           |
| Male gender                                         | 102 (41%)                  | 72 (48%)           | 198 (50%)                 |
| Race / ethnicity                                    |                            |                    |                           |
| Chinese American                                    | 22 (9%)                    | 13 (9%)            | 56 (14%)                  |
| Non-Hispanic black                                  | 67 (27%)                   | 31 (21%)           | 96 (24%)                  |
| Hispanic                                            | 53 (21%)                   | 28 (19%)           | 65 (16%)                  |
| Non-Hispanic white                                  | 105 (43%)                  | 79 (52%)           | 177 (45%)                 |
| Socioeconomic position <sup>a</sup>                 |                            |                    |                           |
| Low                                                 | 73 (30%)                   | 31 (21%)           | 117 (30%)                 |
| Moderate                                            | 97 (39%)                   | 55 (36%)           | 143 (36%)                 |
| High                                                | 77 (31%)                   | 65 (43%)           | 134 (34%)                 |
| Retirement age (years)                              | 63 (59, 67)                | 63 (59, 69)        | 63 (59, 67)               |
| MESA Site                                           |                            |                    |                           |
| Forsyth Co., NC                                     | 42 (17%)                   | 28 (19%)           | 82 (21%)                  |
| New York, NY                                        | 48 (19%)                   | 18 (12%)           | 69 (18%)                  |
| Baltimore City and Co., MD                          | 35 (14%)                   | 21 (14%)           | 37 (9%)                   |
| St. Paul, MN                                        | 49 (20%)                   | 33 (22%)           | 66 (17%)                  |
| Los Angeles Co., CA                                 | 25 (10%)                   | 15 (10%)           | 50 (13%)                  |
| Chicago, IL                                         | 48 (19%)                   | 36 (24%)           | 90 (23%)                  |
| Owned ≥1 car before retirement                      | 205 (83%)                  | 132 (87%)          | 332 (84%)                 |
| Change in self-rated health relative to others      |                            |                    |                           |
| Health improved                                     | 40 (16%)                   | 26 (17%)           | 63 (16%)                  |
| Health declined                                     | 52 (21%)                   | 19 (13%)           | 59 (15%)                  |
| Always same/worse                                   | 65 (26%)                   | 30 (20%)           | 94 (24%)                  |
| Always better                                       | 90 (36%)                   | 76 (50%)           | 178 (45%)                 |
| Change in number of chronic conditions <sup>b</sup> |                            |                    |                           |
| Fewer after retirement                              | 32 (13%)                   | 19 (13%)           | 35 (9%)                   |
| More after retirement                               | 71 (29%)                   | 41 (27%)           | 126 (32%)                 |
| Always 1                                            | 35 (14%)                   | 26 (17%)           | 82 (21%)                  |
| Always >1                                           | 36 (15%)                   | 26 (17%)           | 49 (12%)                  |
| Always 0                                            | 73 (30%)                   | 39 (26%)           | 102 (26%)                 |
| Change in BMI (kg/m <sup>2</sup> )                  | 0.29 (-0.66, 1.42)         | 0.31 (-0.83, 1.26) | 0.20 (-0.65, 1.20)        |
| Job type before retirement                          |                            |                    |                           |
| Part-time                                           | 46 (19%)                   | 31 (21%)           | 75 (19%)                  |
| Other <sup>c</sup>                                  | 34 (14%)                   | 20 (13%)           | 31 (8%)                   |
| Full-time                                           | 167 (68%)                  | 100 (66%)          | 288 (73%)                 |
| Occupational physical activity (MET-hr/week)        | 67 (42, 96)                | 73 (48, 100)       | 75 (53, 103)              |
| <b>Interpersonal correlates</b>                     |                            |                    |                           |
| Change in partnership status                        |                            |                    |                           |
| Never lived with partner                            | 77 (31%)                   | 45 (30%)           | 109 (28%)                 |
| Lived with partner before retirement                | 15 (6%)                    | 9 (6%)             | 23 (6%)                   |
| Lived with partner after retirement                 | 10 (4%)                    | 5 (3%)             | 10 (3%)                   |
| Always lived with partner                           | 145 (59%)                  | 92 (61%)           | 252 (64%)                 |
| Change in caregiver status <sup>d</sup>             |                            |                    |                           |
| Caregiver before retirement                         | 29 (12%)                   | 19 (13%)           | 42 (11%)                  |
| Caregiver after retirement                          | 26 (11%)                   | 20 (13%)           | 54 (14%)                  |
| Always a caregiver                                  | 25 (10%)                   | 10 (7%)            | 41 (10%)                  |
| Never a caregiver                                   | 167 (68%)                  | 102 (68%)          | 257 (65%)                 |
| Low emotional social support <sup>e</sup>           | 9 (4%)                     | 5 (3%)             | 15 (4%)                   |

| Correlate                                       | Decrease<br>≤ -60 min/week | Maintain             | Increase<br>≥ 60 min/week |
|-------------------------------------------------|----------------------------|----------------------|---------------------------|
| <b>Community correlates</b>                     |                            |                      |                           |
| Density of walking destinations (z-score)       | -0.49 (-0.58, 0.20)        | -0.48 (-0.59, -0.04) | -0.46 (-0.61, -0.03)      |
| Density of parks (z-score) <sup>f</sup>         | -0.26 (-0.68, 0.36)        | -0.34 (-0.65, 0.24)  | -0.36 (-0.68, 0.18)       |
| Network ratio (z-score)                         | 0.44 (0.28, 0.55)          | 0.42 (0.29, 0.52)    | 0.43 (0.27, 0.53)         |
| There is a lot of trash on the street           |                            |                      |                           |
| Agree                                           | 37 (15%)                   | 26 (17%)             | 67 (17%)                  |
| Disagree                                        | 210 (85%)                  | 125 (83%)            | 327 (83%)                 |
| There is a lot of noise in my neighborhood      |                            |                      |                           |
| Agree                                           | 96 (39%)                   | 55 (36%)             | 142 (36%)                 |
| Disagree                                        | 151 (61%)                  | 96 (64%)             | 252 (64%)                 |
| My neighborhood is attractive                   |                            |                      |                           |
| Disagree                                        | 48 (19%)                   | 15 (10%)             | 74 (19%)                  |
| Agree                                           | 199 (81%)                  | 136 (90%)            | 320 (81%)                 |
| I feel safe walking day or night                |                            |                      |                           |
| Disagree                                        | 59 (24%)                   | 33 (22%)             | 96 (24%)                  |
| Agree                                           | 188 (76%)                  | 118 (78%)            | 298 (76%)                 |
| Violence is a problem in my neighborhood        |                            |                      |                           |
| Agree                                           | 64 (26%)                   | 36 (24%)             | 97 (25%)                  |
| Disagree                                        | 183 (74%)                  | 115 (76%)            | 297 (75%)                 |
| It is pleasant to walk in my neighborhood       |                            |                      |                           |
| Disagree                                        | 34 (14%)                   | 10 (7%)              | 51 (13%)                  |
| Agree                                           | 213 (86%)                  | 141 (93%)            | 343 (87%)                 |
| It is easy to walk to places                    |                            |                      |                           |
| Disagree                                        | 60 (24%)                   | 20 (13%)             | 80 (20%)                  |
| Agree                                           | 187 (76%)                  | 131 (87%)            | 314 (80%)                 |
| I often see other people walking                |                            |                      |                           |
| Disagree                                        | 28 (11%)                   | 9 (6%)               | 43 (11%)                  |
| Agree                                           | 219 (89%)                  | 142 (94%)            | 351 (89%)                 |
| I often see other people exercise               |                            |                      |                           |
| Disagree                                        | 65 (26%)                   | 20 (13%)             | 86 (22%)                  |
| Agree                                           | 182 (74%)                  | 131 (87%)            | 308 (78%)                 |
| Neighborhood social cohesion                    |                            |                      |                           |
| Low                                             | 16 (6%)                    | 8 (5%)               | 29 (7%)                   |
| Moderate                                        | 144 (58%)                  | 80 (53%)             | 221 (56%)                 |
| High                                            | 87 (35%)                   | 63 (42%)             | 144 (37%)                 |
| Population density (thousands/mi <sup>2</sup> ) | 6.2 (2.9, 17.1)            | 5.9 (2.9, 14.6)      | 6.3 (2.6, 14.4)           |

Abbreviations: BMI body mass index; MESA Multi-Ethnic Study of Atherosclerosis; MET metabolic task equivalent

<sup>a</sup> Composite index of education, income, and four indicators of wealth (ownership of home, land/property, car, investments)

<sup>b</sup> Chronic conditions included asthma, emphysema, arthritis flare up in the past two weeks, high cholesterol, hypertension, diabetes, kidney disease, cancer, and cardiovascular disease.

<sup>c</sup> Includes homemaking, unemployment, and on-leave from work.

<sup>d</sup> Caregiver defined as reporting ≥150 min/week of caregiving physical activity for children or adults

<sup>e</sup> ENRICH Social Support Inventory (6 items) measured prior to retirement, and dichotomized as low (score ≤12) vs. high (score > 12)

<sup>f</sup> Park data only available for N=718 participants

Notes: Potential individual-, interpersonal-, and community-level correlates by category of change in recreational walking after retirement (decreased (≤ -60 min/week); maintained (within 60 min/week); or increased (≥ 60 min/week)) among MESA participants reporting >0 min/week recreational walking before or after retirement (N=792). Values are N (%) or median (first quartile, third quartile). Correlates measured at MESA exams (2000 to 2012) or obtained from external sources (local and federal governments, Esri, and the National Establishment Time Series database), as indicated in Table 1.

Supplemental Table 2. Distribution of potential correlates of changes in transport walking after retirement

| Correlate                                           | Decrease<br>≤ -60 min/week | Maintain           | Increase<br>≥ 60 min/week |
|-----------------------------------------------------|----------------------------|--------------------|---------------------------|
| <b>Total</b>                                        | 353 (40%)                  | 172 (19%)          | 362 (41%)                 |
| <b>Individual correlates</b>                        |                            |                    |                           |
| Male gender                                         | 160 (45%)                  | 81 (47%)           | 162 (45%)                 |
| Race / ethnicity                                    |                            |                    |                           |
| Chinese American                                    | 32 (9%)                    | 27 (16%)           | 36 (10%)                  |
| Non-Hispanic black                                  | 90 (25%)                   | 50 (29%)           | 103 (28%)                 |
| Hispanic                                            | 71 (20%)                   | 22 (13%)           | 66 (18%)                  |
| Non-Hispanic white                                  | 160 (45%)                  | 73 (42%)           | 157 (43%)                 |
| Socioeconomic position <sup>a</sup>                 |                            |                    |                           |
| Low                                                 | 96 (27%)                   | 51 (30%)           | 105 (29%)                 |
| Moderate                                            | 149 (42%)                  | 60 (35%)           | 135 (37%)                 |
| High                                                | 108 (31%)                  | 61 (35%)           | 122 (34%)                 |
| Retirement age (years)                              | 63 (59, 67)                | 63 (59, 68)        | 62 (58, 67)               |
| MESA Site                                           |                            |                    |                           |
| Forsyth Co., NC                                     | 70 (20%)                   | 39 (23%)           | 61 (17%)                  |
| New York, NY                                        | 62 (18%)                   | 13 (8%)            | 79 (22%)                  |
| Baltimore City and Co., MD                          | 43 (12%)                   | 22 (13%)           | 52 (14%)                  |
| St. Paul, MN                                        | 75 (21%)                   | 27 (16%)           | 60 (17%)                  |
| Los Angeles Co., CA                                 | 29 (8%)                    | 39 (23%)           | 33 (9%)                   |
| Chicago, IL                                         | 74 (21%)                   | 32 (19%)           | 77 (21%)                  |
| Owned ≥1 car before retirement                      | 300 (85%)                  | 156 (91%)          | 297 (82%)                 |
| Change in self-rated health relative to others      |                            |                    |                           |
| Health improved                                     | 48 (14%)                   | 27 (16%)           | 64 (18%)                  |
| Health declined                                     | 60 (17%)                   | 18 (10%)           | 67 (19%)                  |
| Always same/worse                                   | 89 (25%)                   | 52 (30%)           | 77 (21%)                  |
| Always better                                       | 156 (44%)                  | 75 (44%)           | 154 (43%)                 |
| Change in number of chronic conditions <sup>b</sup> |                            |                    |                           |
| Fewer after retirement                              | 32 (9%)                    | 20 (12%)           | 44 (12%)                  |
| More after retirement                               | 105 (30%)                  | 47 (27%)           | 110 (30%)                 |
| Always 1                                            | 72 (20%)                   | 25 (15%)           | 75 (21%)                  |
| Always >1                                           | 47 (13%)                   | 30 (17%)           | 50 (14%)                  |
| Always 0                                            | 97 (27%)                   | 50 (29%)           | 83 (23%)                  |
| Change in BMI (kg/m <sup>2</sup> )                  | 0.16 (-0.65, 1.28)         | 0.21 (-0.76, 1.34) | 0.29 (-0.78, 1.32)        |
| Job type before retirement                          |                            |                    |                           |
| Part-time                                           | 71 (20%)                   | 33 (19%)           | 59 (16%)                  |
| Other <sup>c</sup>                                  | 36 (10%)                   | 21 (12%)           | 37 (10%)                  |
| Full-time                                           | 246 (70%)                  | 118 (69%)          | 266 (73%)                 |
| Occupational physical activity (MET-hr/week)        | 75 (53, 102)               | 73 (43, 102)       | 75 (53, 100)              |
| <b>Interpersonal correlates</b>                     |                            |                    |                           |
| Change in partnership status                        |                            |                    |                           |
| Never lived with partner                            | 115 (33%)                  | 51 (30%)           | 116 (32%)                 |
| Lived with partner before retirement                | 20 (6%)                    | 5 (3%)             | 29 (8%)                   |
| Lived with partner after retirement                 | 13 (4%)                    | 5 (3%)             | 7 (2%)                    |
| Always lived with partner                           | 205 (58%)                  | 111 (65%)          | 210 (58%)                 |
| Change in caregiver status <sup>d</sup>             |                            |                    |                           |
| Caregiver before retirement                         | 44 (12%)                   | 16 (9%)            | 49 (14%)                  |
| Caregiver after retirement                          | 39 (11%)                   | 31 (18%)           | 38 (10%)                  |
| Always a caregiver                                  | 44 (12%)                   | 11 (6%)            | 31 (9%)                   |
| Never a caregiver                                   | 226 (64%)                  | 114 (66%)          | 244 (67%)                 |
| Low emotional social support                        | 14 (4%)                    | 7 (4%)             | 12 (3%)                   |

| Correlate                                       | Decrease<br>≤ -60 min/week | Maintain             | Increase<br>≥ 60 min/week |
|-------------------------------------------------|----------------------------|----------------------|---------------------------|
| <b>Community correlates</b>                     |                            |                      |                           |
| Density of walking destinations (z-score)       | -0.49 (-0.61, -0.04)       | -0.49 (-0.57, -0.24) | -0.41 (-0.59, 0.59)       |
| Density of parks (z-score) <sup>e</sup>         | -0.26 (-0.68, 0.32)        | -0.41 (-0.67, -0.14) | -0.27 (-0.63, 0.39)       |
| Network ratio (z-score)                         | 0.43 (0.26, 0.54)          | 0.43 (0.27, 0.51)    | 0.43 (0.31, 0.53)         |
| There is a lot of trash on the street           |                            |                      |                           |
| Agree                                           | 66 (19%)                   | 17 (10%)             | 64 (18%)                  |
| Disagree                                        | 287 (81%)                  | 155 (90%)            | 298 (82%)                 |
| There is a lot of noise in my neighborhood      |                            |                      |                           |
| Agree                                           | 140 (40%)                  | 51 (30%)             | 138 (38%)                 |
| Disagree                                        | 213 (60%)                  | 121 (70%)            | 224 (62%)                 |
| My neighborhood is attractive                   |                            |                      |                           |
| Disagree                                        | 62 (18%)                   | 27 (16%)             | 71 (20%)                  |
| Agree                                           | 291 (82%)                  | 145 (84%)            | 291 (80%)                 |
| I feel safe walking day or night                |                            |                      |                           |
| Disagree                                        | 89 (25%)                   | 41 (24%)             | 85 (23%)                  |
| Agree                                           | 264 (75%)                  | 131 (76%)            | 277 (77%)                 |
| Violence is a problem in my neighborhood        |                            |                      |                           |
| Agree                                           | 92 (26%)                   | 37 (22%)             | 89 (25%)                  |
| Disagree                                        | 261 (74%)                  | 135 (78%)            | 273 (75%)                 |
| It is pleasant to walk in my neighborhood       |                            |                      |                           |
| Disagree                                        | 50 (14%)                   | 21 (12%)             | 42 (12%)                  |
| Agree                                           | 303 (86%)                  | 151 (88%)            | 320 (88%)                 |
| It is easy to walk to places                    |                            |                      |                           |
| Disagree                                        | 83 (24%)                   | 37 (22%)             | 70 (19%)                  |
| Agree                                           | 270 (76%)                  | 135 (78%)            | 292 (81%)                 |
| I often see other people walking                |                            |                      |                           |
| Disagree                                        | 38 (11%)                   | 24 (14%)             | 33 (9%)                   |
| Agree                                           | 315 (89%)                  | 148 (86%)            | 329 (91%)                 |
| I often see other people exercise               |                            |                      |                           |
| Disagree                                        | 80 (23%)                   | 45 (26%)             | 78 (22%)                  |
| Agree                                           | 273 (77%)                  | 127 (74%)            | 284 (78%)                 |
| Neighborhood social cohesion                    |                            |                      |                           |
| Low                                             | 24 (7%)                    | 11 (6%)              | 28 (8%)                   |
| Moderate                                        | 196 (56%)                  | 99 (58%)             | 208 (57%)                 |
| High                                            | 133 (38%)                  | 62 (36%)             | 126 (35%)                 |
| Population density (thousands/mi <sup>2</sup> ) | 5.9 (2.7, 14.8)            | 6.6 (2.6, 11.2)      | 6.7 (3.3, 19.6)           |

Abbreviations: BMI body mass index; MESA Multi-Ethnic Study of Atherosclerosis; MET metabolic task equivalent

<sup>a</sup> Composite index of education, income, and four indicators of wealth (ownership of home, land/property, car, investments)

<sup>b</sup> Chronic conditions included asthma, emphysema, arthritis flare up in the past two weeks, high cholesterol, hypertension, diabetes, kidney disease, cancer, and cardiovascular disease.

<sup>c</sup> Includes homemaking, unemployment, and on-leave from work.

<sup>d</sup> Caregiver defined as reporting ≥150 min/week of caregiving physical activity for children or adults

<sup>e</sup> ENRICH Social Support Inventory (6 items) measured prior to retirement, and dichotomized as low (score ≤12) vs. high (score > 12)

<sup>f</sup> Park data only available for N=807 participants

Notes: Potential individual-, interpersonal-, and community-level correlates by category of change in transport walking after retirement (decreased (≤ -60 min/week); maintained (within 60 min/week); or increased (≥ 60 min/week)) among MESA participants reporting >0 min/week transport walking before or after retirement (N=887). Values are N (%) or median (first quartile, third quartile). Correlates measured at MESA exams (2000 to 2012) or obtained from external sources (local and federal governments, Esri, and the National Establishment Time Series database), as indicated in Table 1.

Supplemental Table 3. Correlates associated with change in recreational walking after retirement among participants who did not move

| <b>Correlate Level</b>                              | <b>Decrease vs. maintain</b> | <b>Increase vs. maintain</b> |
|-----------------------------------------------------|------------------------------|------------------------------|
| Correlate                                           | OR (95% CI)                  | OR (95% CI)                  |
| <b>Core variables</b>                               |                              |                              |
| Gender                                              |                              |                              |
| Male                                                | 0.97 (0.52, 1.82)            | 0.93 (0.57, 1.52)            |
| Female                                              | 1 (ref)                      | 1 (ref)                      |
| Socioeconomic position <sup>a</sup>                 |                              |                              |
| Low                                                 | <b>4.27 (1.70, 10.74)*</b>   | <b>2.57 (1.34, 4.91)*</b>    |
| Moderate                                            | 1.93 (0.92, 4.03)            | <b>1.89 (1.07, 3.32)*</b>    |
| High                                                | 1 (ref)                      | 1 (ref)                      |
| Race/ethnicity                                      |                              |                              |
| Chinese American                                    | 1.24 (0.40, 3.87)            | 0.86 (0.33, 2.25)            |
| Non-Hispanic black                                  | 1.28 (0.62, 2.66)            | 0.98 (0.55, 1.74)            |
| Hispanic                                            | 0.73 (0.34, 1.53)            | 0.49 (0.24, 1.03)            |
| Non-Hispanic white                                  | 1 (ref)                      | 1 (ref)                      |
| Retirement age (1-year increase)                    | 0.98 (0.94, 1.03)            | 0.99 (0.95, 1.03)            |
| Time between exams (1-year difference)              | 1.07 (0.93, 1.23)            | 1.08 (0.95, 1.22)            |
| Season of pre-retirement exam                       |                              |                              |
| Spring                                              | 1.33 (0.60, 2.97)            | 1.16 (0.61, 2.19)            |
| Summer                                              | 1.33 (0.62, 2.85)            | 1.34 (0.72, 2.50)            |
| Fall                                                | 0.72 (0.31, 1.65)            | 1.02 (0.53, 1.98)            |
| Winter                                              | 1 (ref)                      | 1 (ref)                      |
| Season of post-retirement exam                      |                              |                              |
| Spring                                              | <b>0.34 (0.16, 0.75)*</b>    | 1.05 (0.51, 2.16)            |
| Summer                                              | 0.62 (0.28, 1.39)            | 1.46 (0.67, 3.17)            |
| Fall                                                | 0.58 (0.24, 1.40)            | 1.09 (0.56, 2.14)            |
| Winter                                              | 1 (ref)                      | 1 (ref)                      |
| MESA site                                           |                              |                              |
| Forsyth Co., NC                                     | 0.90 (0.35, 2.28)            | 0.80 (0.36, 1.78)            |
| New York, NY                                        | 1.02 (0.33, 3.15)            | 0.64 (0.27, 1.51)            |
| Baltimore City and Co., MD                          | 1.37 (0.47, 4.05)            | 0.45 (0.17, 1.22)            |
| St. Paul, MN                                        | 1.06 (0.37, 3.04)            | 0.41 (0.15, 1.10)            |
| Los Angeles Co., CA                                 | 0.54 (0.13, 2.23)            | 0.70 (0.28, 1.74)            |
| Chicago, IL                                         | 1 (ref)                      | 1 (ref)                      |
| Pre-retirement recreational walking                 |                              |                              |
| < 90 min/week                                       | <b>0.07 (0.03, 0.16)*</b>    | <b>2.27 (1.14, 4.54)*</b>    |
| 90 to 210 min/week                                  | <b>0.41 (0.20, 0.84)*</b>    | <b>2.03 (1.07, 3.87)*</b>    |
| > 210 min/week                                      | 1 (ref)                      | 1 (ref)                      |
| <b>Individual level</b>                             |                              |                              |
| Self-rated health relative to others                |                              |                              |
| Improved after retirement                           | 1.82 (0.76, 4.40)            |                              |
| Declined after retirement                           | <b>2.98 (1.42, 6.25)*</b>    |                              |
| Always "same" / "worse"                             | <b>3.11 (1.27, 7.61)*</b>    |                              |
| Always "better"                                     | 1 (ref)                      |                              |
| Change in number of chronic conditions <sup>b</sup> |                              |                              |
| Fewer after retirement                              |                              | 0.75 (0.32, 1.75)            |
| More after retirement                               |                              | 0.96 (0.51, 1.77)            |
| 1 chronic condition                                 |                              | 1.43 (0.64, 3.19)            |
| >1 condition                                        |                              | 0.53 (0.25, 1.15)            |
| No chronic conditions                               |                              | 1 (ref)                      |

| <b>Correlate Level</b>                                   | <b>Decrease vs. maintain</b> | <b>Increase vs. maintain</b> |
|----------------------------------------------------------|------------------------------|------------------------------|
| Correlate                                                | OR (95% CI)                  | OR (95% CI)                  |
| Job type prior to retirement                             |                              |                              |
| Part-time                                                |                              | 0.75 (0.43, 1.33)            |
| Other <sup>c</sup>                                       |                              | <b>0.44 (0.20, 0.98)*</b>    |
| Full-time                                                |                              | 1 (ref)                      |
| <b>Community level</b>                                   |                              |                              |
| Aesthetic quality: there is a lot of trash on the street |                              |                              |
| Disagree                                                 | 1.87 (0.90, 3.85)            |                              |
| Agree                                                    | 1 (ref)                      |                              |
| Aesthetic quality: my neighborhood is attractive         |                              |                              |
| Agree                                                    |                              | 0.47 (0.21, 1.02)            |
| Disagree                                                 |                              | 1 (ref)                      |
| Walking environment: it is easy to walk places           |                              |                              |
| Agree                                                    | 0.47 (0.21, 1.07)            | 0.63 (0.33, 1.21)            |
| Disagree                                                 | 1 (ref)                      | 1 (ref)                      |
| Walking environment: I see others exercise               |                              |                              |
| Agree                                                    | 0.56 (0.24, 1.28)            |                              |
| Disagree                                                 | 1 (ref)                      |                              |

Abbreviations: CI confidence interval; MESA Multi-Ethnic Study of Atherosclerosis; OR odds ratio

<sup>a</sup> Composite index of education, income, and four indicators of wealth (ownership of home, land/property, car, investments)

<sup>b</sup> Chronic conditions included asthma, emphysema, arthritis flare up in the past two weeks, high cholesterol, hypertension, diabetes, kidney disease, cancer, and cardiovascular disease.

<sup>c</sup> Includes homemaking, unemployment, and on-leave from work at the exam prior to retirement.

\* p-value < 0.05

Notes: Individual-, interpersonal-, and community-level correlates associated with decreased ( $\leq -60$  min/week; N=197) or increased ( $\geq 60$  min/week; N=306) recreational walking after retirement compared to maintaining recreational walking after retirement (within 60 min/week; N=120) among MESA participants reporting  $>0$  min/week recreational walking before or after retirement and who did not move residence between the pre- and post-retirement MESA exams (data collected 2000 to 2012). Odds ratios (95% CI) from separate multivariable logistic regression models comparing decreased vs. maintained and increased vs. maintained categories. Correlates selected based on models for the overall sample, as shown in Table 4. Final models estimated using generalized estimating equations with exchangeable correlation structure.

Supplemental Table 4. Correlates associated with change in transport walking after retirement among participants who did not move

| Correlate Level                              | Decrease vs.<br>maintain   | Increase vs.<br>maintain  |
|----------------------------------------------|----------------------------|---------------------------|
| Correlate                                    | OR (95% CI)                | OR (95% CI)               |
| <b>Core variables</b>                        |                            |                           |
| Gender                                       |                            |                           |
| Male                                         | 1.42 (0.80, 2.53)          | 0.98 (0.59, 1.63)         |
| Female                                       | 1 (ref)                    | 1 (ref)                   |
| Socioeconomic position <sup>a</sup>          |                            |                           |
| Low                                          | 2.23 (0.92, 5.38)          | 0.81 (0.45, 1.45)         |
| Moderate                                     | 1.87 (0.97, 3.60)          | 1.04 (0.62, 1.76)         |
| High                                         | 1 (ref)                    | 1 (ref)                   |
| Race/ethnicity                               |                            |                           |
| Chinese American                             | 1.63 (0.56, 4.79)          | 1.09 (0.50, 2.40)         |
| Non-Hispanic black                           | 0.78 (0.38, 1.57)          | 0.85 (0.48, 1.50)         |
| Hispanic                                     | 1.12 (0.35, 3.56)          | 1.09 (0.50, 2.34)         |
| Non-Hispanic white                           | 1 (ref)                    | 1 (ref)                   |
| Retirement age (1-year increase)             | 0.98 (0.93, 1.03)          | 0.97 (0.94, 1.01)         |
| Time between exams (1-year difference)       | 1.05 (0.92, 1.20)          | 1.08 (0.97, 1.19)         |
| Season of pre-retirement exam                |                            |                           |
| Spring                                       | 1.61 (0.71, 3.69)          | 1.68 (0.97, 2.93)         |
| Summer                                       | 1.95 (0.83, 4.60)          | 1.54 (0.82, 2.92)         |
| Fall                                         | 2.01 (0.86, 4.71)          | 1.56 (0.83, 2.93)         |
| Winter                                       | 1 (ref)                    | 1 (ref)                   |
| Season of post-retirement exam               |                            |                           |
| Spring                                       | 0.53 (0.24, 1.17)          | 0.97 (0.53, 1.78)         |
| Summer                                       | <b>0.30 (0.13, 0.68)*</b>  | 0.78 (0.41, 1.49)         |
| Fall                                         | 0.89 (0.35, 2.26)          | 1.32 (0.65, 2.67)         |
| Winter                                       | 1 (ref)                    | 1 (ref)                   |
| MESA site                                    |                            |                           |
| Forsyth Co., NC                              | 0.97 (0.37, 2.52)          | 0.67 (0.34, 1.30)         |
| New York, NY                                 | <b>4.80 (1.20, 19.20)*</b> | <b>2.76 (1.12, 6.78)*</b> |
| Baltimore City and Co., MD                   | 1.22 (0.41, 3.60)          | 1.08 (0.49, 2.41)         |
| St. Paul, MN                                 | 2.33 (0.81, 6.69)          | 0.80 (0.42, 1.51)         |
| Los Angeles Co., CA                          | 0.62 (0.19, 2.02)          | <b>0.32 (0.15, 0.69)*</b> |
| Chicago, IL                                  | 1 (ref)                    | 1 (ref)                   |
| Pre-retirement transport walking             |                            |                           |
| < 90 min/week                                | <b>0.01 (0.00, 0.02)*</b>  | 0.97 (0.50, 1.89)         |
| 90 to 300 min/week                           | <b>0.14 (0.07, 0.28)*</b>  | 1.00 (0.51, 1.96)         |
| >300 min/week                                | 1 (ref)                    | 1 (ref)                   |
| <b>Individual level</b>                      |                            |                           |
| Self-rated health relative to others         |                            |                           |
| Improved after retirement                    |                            | 1.39 (0.69, 2.80)         |
| Declined after retirement                    |                            | <b>2.18 (1.07, 4.42)*</b> |
| Always "same" / "worse"                      |                            | 0.68 (0.37, 1.25)         |
| Always "better"                              |                            | 1 (ref)                   |
| <b>Interpersonal level</b>                   |                            |                           |
| Change in partnership status                 |                            |                           |
| Never married/lived with partner             | 1.14 (0.60, 2.20)          | 1.00 (0.54, 1.83)         |
| Married/lived with partner before retirement | 2.08 (0.50, 8.62)          | 3.40 (0.84, 13.73)        |
| Married/lived with partner after retirement  | 2.57 (0.66, 10.03)         | 1.12 (0.13, 9.40)         |
| Always married/lived with partner            | 1 (ref)                    | 1 (ref)                   |

| <b>Correlate Level</b>                                   | <b>Decrease vs. maintain</b> | <b>Increase vs. maintain</b> |
|----------------------------------------------------------|------------------------------|------------------------------|
| Correlate                                                | OR (95% CI)                  | OR (95% CI)                  |
| Change in caregiver status <sup>b</sup>                  |                              |                              |
| Caregiver before retirement                              | 0.55 (0.21, 1.43)            |                              |
| Caregiver after retirement                               | <b>0.28 (0.12, 0.63)*</b>    |                              |
| Always a caregiver                                       | 2.44 (0.73, 8.16)            |                              |
| Never a caregiver                                        | 1 (ref)                      |                              |
| <b>Community level</b>                                   |                              |                              |
| Density of walking destinations (1-SD unit increase)     | <b>0.59 (0.38, 0.91)*</b>    |                              |
| Aesthetic quality: there is a lot of trash on the street |                              |                              |
| Disagree                                                 | 0.57 (0.25, 1.32)            |                              |
| Agree                                                    | 1 (ref)                      |                              |
| Aesthetic quality: my neighborhood is attractive         |                              |                              |
| Agree                                                    |                              | 0.73 (0.42, 1.26)            |
| Disagree                                                 |                              | 1 (ref)                      |
| Safety: violence is a problem in my neighborhood         |                              |                              |
| Disagree                                                 | 1.37 (0.68, 2.78)            |                              |
| Agree                                                    | 1 (ref)                      |                              |
| Walking environment: it is easy to walk places           |                              |                              |
| Agree                                                    | 0.79 (0.34, 1.83)            |                              |
| Disagree                                                 | 1 (ref)                      |                              |
| Walking environment: I see others walking                |                              |                              |
| Agree                                                    | 1.93 (0.69, 5.38)            | 1.19 (0.56, 2.51)            |
| Disagree                                                 | 1 (ref)                      | 1 (ref)                      |

Abbreviations: CI confidence interval; MESA Multi-Ethnic Study of Atherosclerosis; OR odds ratio; SD standard deviation

<sup>a</sup> Composite index of education, income, and four indicators of wealth (ownership of home, land/property, car, investments)

<sup>b</sup> Caregiver defined as reporting  $\geq 150$  min/week of caregiving physical activity to children or adults

\* P-value < 0.05

Notes: Individual-, interpersonal-, and community-level correlates associated with decreased ( $\leq -60$  min/week; N=278) or increased ( $\geq 60$  min/week; N=287) transport walking after retirement compared to maintaining transport walking after retirement (within 60 min/week; N=139) among MESA participants reporting  $>0$  min/week transport walking before or after retirement and who did not move residence between the pre- and post-retirement MESA exams (data collected 2000 to 2012). Odds ratios (95% CI) from separate multivariable logistic regression models comparing decreased vs. maintained and increased vs. maintained categories. Correlates selected based on models for the overall sample, as shown in Table 5. Final models estimated using generalized estimating equations with exchangeable correlation structure.
